# Supplementary material for: Spin exchange, electronic correlation, and thermoelectric transport in Rb 2 GeMBr 6 (M = V, Mn, Ni) halide double perovskites from first principles calculations
Source: Royal Society of Chemistry journal article supplement (doi:10.1039/d5tc01842k), 2025-11-13
Supplement: d5tc01842k1.pdf [file d5tc01842k1.pdf]

## Supporting information

# Spin exchange, electronic correlation, and thermoelectric transport in $\text{Rb}_2\text{GeMBr}_6$ ( $\text{M} = \text{V}, \text{Mn}, \text{Ni}$ ) halide double perovskites from first principles calculations

Mudasir Younis Sofi<sup>1,\*</sup>, Mohd. Shahid Khan<sup>1</sup>, M. Ajmal Khan<sup>\*</sup>

<sup>\*,1</sup>Department of Physics, Jamia Millia Islamia, New Delhi-110025

<sup>\*,1</sup>**Email:** [majkhan@jmi.ac.in](mailto:majkhan@jmi.ac.in), [mudasir2009152@st.jmi.ac.in](mailto:mudasir2009152@st.jmi.ac.in)

## I. Phase stability diagrams

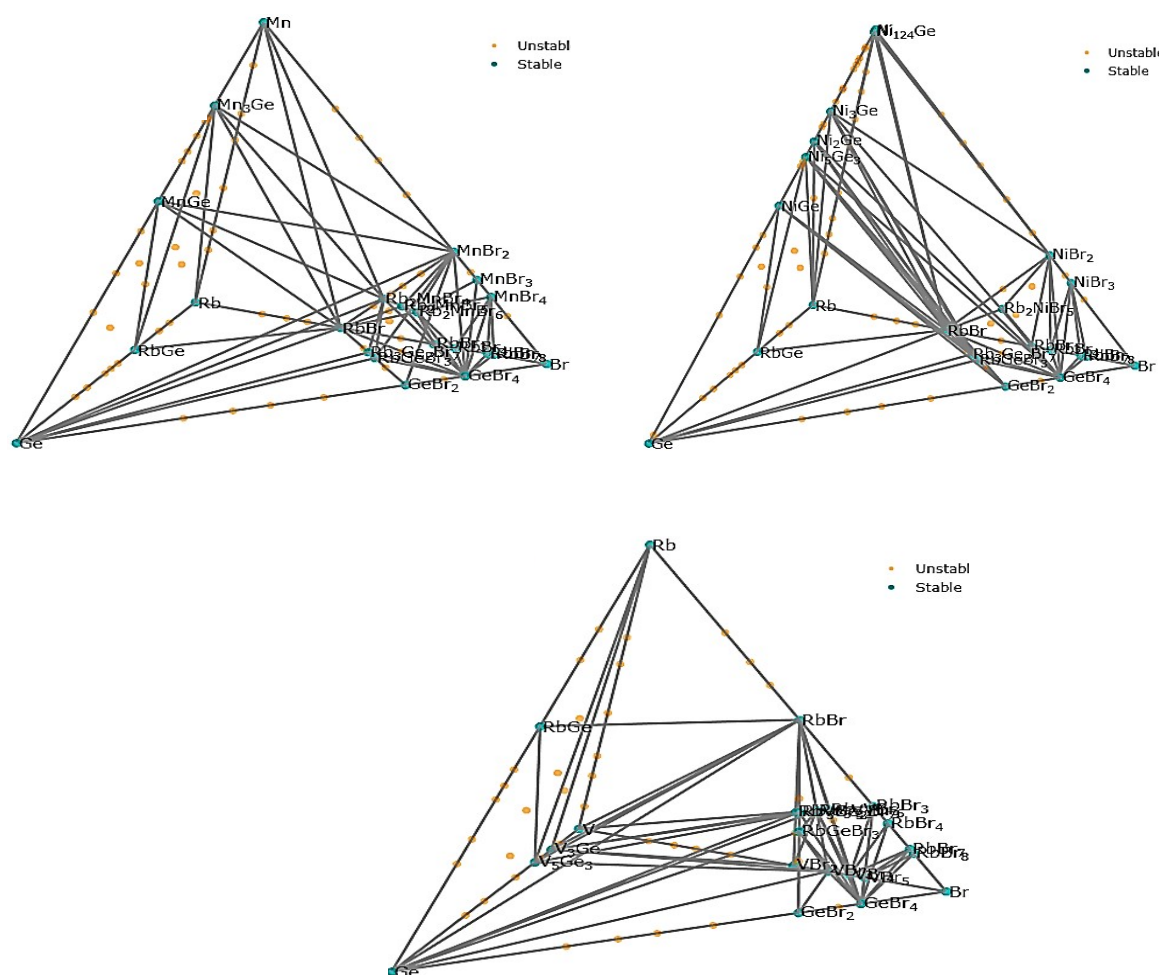

**Figure S1.** Phase stability diagrams of  $\text{Rb}_2\text{GeMBr}_6$  ( $\text{M} = \text{V}, \text{Mn}, \text{Ni}$ ) halide double perovskites, illustrating the thermodynamic equilibrium regions of stable compounds in the Rb-Ge-M-Br quaternary system.

The phase stability diagrams presented in **Figure S1** provide a detailed thermodynamic map of the compositional conditions necessary for the stable formation of  $\text{Rb}_2\text{GeMBr}_6$  ( $\text{M} = \text{V}, \text{Mn}, \text{Ni}$ ) halide double perovskites. Constructed using calculated chemical potentials and Gibbs free energy minimization, these triangular compositional diagrams delineate the equilibrium regions where each compound can coexist with its elemental and binary phases, offering a precise understanding of their thermodynamic stability. For  $\text{Rb}_2\text{GeVBr}_6$ , the stability region is defined by a clear phase boundary, surrounded by competing phases such as  $\text{VBr}_2$ ,  $\text{GeBr}_4$ , and  $\text{RbBr}$ . This well-defined domain indicates the optimal chemical potential range for vanadium, ensuring the selective formation of the desired  $\text{Rb}_2\text{GeVBr}_6$  phase while minimizing the risk of impurity phases. The robustness of this stability window is crucial for controlled synthesis, where slight deviations in chemical potential could result in the formation of undesirable byproducts. In the case of  $\text{Rb}_2\text{GeMnBr}_6$ , the phase stability diagram reveals a more complex landscape. The coexistence with  $\text{MnBr}_2$  and other germanium halide species highlights the sensitivity of Mn-based perovskite stability to variations in chemical potential. The sharp phase boundaries reflect the delicate balance required to maintain the pure  $\text{Rb}_2\text{GeMnBr}_6$  phase, where slight fluctuations in Mn or Br content can destabilize the desired structure. This sensitivity underscores the importance of precise compositional control during synthesis. The phase stability of  $\text{Rb}_2\text{GeNiBr}_6$  is characterized by a relatively narrow stability region, tightly constrained by phase coexistence with  $\text{NiBr}_2$ ,  $\text{GeBr}_4$ , and  $\text{RbBr}$ . This limited stability window emphasizes the need for precise chemical potential control to synthesize the pure Ni-based perovskite phase without contamination. The narrow region also suggests that  $\text{Rb}_2\text{GeNiBr}_6$  is more susceptible to phase competition, requiring careful adjustment of reaction conditions for successful synthesis. Collectively, these phase stability diagrams are invaluable for guiding experimental synthesis of  $\text{Rb}_2\text{GeMBr}_6$  perovskites. They provide a clear understanding of the chemical environments favorable for the formation of the target phases while avoiding the emergence of competing impurities.

## II. Elastic properties

**Table S1. Mechanical properties of  $\text{Rb}_2\text{GeMBr}_6$  ( $\text{M} = \text{V}, \text{Mn}, \text{Ni}$ ) double perovskites determined using Voigt, Reuss, and Hill averaging schemes.**

| Compound                                | Averaging | Bulk modulus (K) (GPa) | Young's modulus (E) (GPa) | Shear modulus (G) (GPa) | Poisson's ratio ( $\nu$ ) |
|-----------------------------------------|-----------|------------------------|---------------------------|-------------------------|---------------------------|
| <b>Rb<sub>2</sub>GeVBr<sub>6</sub></b>  | Voigt     | 24.573                 | 38.790                    | 15.680                  | 0.23691                   |
|                                         | Reuss     | 24.573                 | 36.356                    | 14.503                  | 0.25342                   |
|                                         | Hill      | 24.573                 | 37.581                    | 15.091                  | 0.24511                   |
| <b>Rb<sub>2</sub>GeMnBr<sub>6</sub></b> | Voigt     | 24.050                 | 37.292                    | 15.018                  | 0.24157                   |
|                                         | Reuss     | 24.050                 | 36.565                    | 14.666                  | 0.24661                   |
|                                         | Hill      | 24.050                 | 36.929                    | 14.842                  | 0.24408                   |
| <b>Rb<sub>2</sub>GeNiBr<sub>6</sub></b> | Voigt     | 25.050                 | 39.161                    | 15.798                  | 0.23944                   |
|                                         | Reuss     | 25.050                 | 38.812                    | 15.628                  | 0.24177                   |
|                                         | Hill      | 25.050                 | 38.987                    | 15.713                  | 0.24061                   |

**Table S1** summarizes the calculated elastic constants of Rb<sub>2</sub>GeMBr<sub>6</sub> (M = V, Mn, Ni) double perovskites obtained using Voigt, Reuss, and Hill averaging schemes. All compounds exhibit comparable bulk moduli ( $\approx 24$ – $25$  GPa), moderate Young's moduli ( $\approx 36$ – $39$  GPa), and shear moduli ( $\approx 14$ – $16$  GPa), indicating their mechanically soft yet stable nature. The Poisson's ratios ( $\nu \approx 0.24$ – $0.25$ ) suggest predominant central interatomic forces and ductile mechanical behavior. Overall, the consistency between Voigt and Reuss bounds confirms the mechanical stability and elastic isotropy of these compounds.
